# Supplementary material
Source: Research Square preprint supplement (doi:10.21203/rs.3.rs-9536844/v1)
Supplement: Supplementary file 1 [file 46ffde23615775746624f029.docx]

**Table 1.** 1H and 13C NMR chemical shifts of γ-curcumene (in CDCl3).

| Position | 1H (δ) | Multiplet | J (Hz) | Protons | 13C (δ) | γ-curcumene |
| --- | --- | --- | --- | --- | --- | --- |
| 1 |  |  |  |  | 133.3 |  |
| 2 | 5.61 | dd | 5.3, 1.2 | 1H | 119.6 |
| 3 | 5.58 | d | 5.3 | 1H | 118.5 |
| 4 |  |  |  |  | 140.8 |
| 5 | 2.03-2.10 | m |  | 2H | 24.1 |
| 6 | 2.03-2.10 | m |  | 2H | 29.0 |
| 7 | 1.77 | s |  | 3H | 23.0 |
| 8 | 2.13-2.18 | m |  | 1H | 40.2 |
| 9 | 1.00 | d | 6.9 | 3H | 19.6 |
| 10 | 1.40-1.46  1.27-1.32 | m  m |  | 1H  1H | 35.2 |
| 11 | 1.87-1.94 | m |  | 2H | 26.2 |
| 12 | 5.10 | tt | 7.2, 1.2 | 1H | 124.8 |
| 13 |  |  |  |  | 131.2 |
| 14 | 1.58 | s |  | 3H | 17.7 |
| 15 | 1.67 | s |  | 3H | 25.8 |
