# Supplementary material
Source: Research Square preprint supplement (doi:10.21203/rs.3.rs-9536844/v1)
Supplement: Supplementary file 2 [file dc7c1d5a75f66f1ae7fa7f7f.pdf]

*Supplementary information*

**Microbial Production of  $\gamma$ -Curcumene in Metabolically Engineered *Escherichia coli* Using a Novel  $\gamma$ -Curcumene Synthase from *Parthenium argentatum***

Min Ju Lee<sup>a,†</sup>, Seong Keun Kim<sup>a,†</sup>, Eun Jung Jeon<sup>b,†</sup>, Hyun Seung Lim<sup>a,1</sup>, Ho Bum Kang<sup>a,c</sup>, Byung Gwan Park<sup>d</sup>, Yoon-Joo Ko<sup>e</sup>, Byeongsan Lee<sup>f</sup>, Seung Gyun Woo<sup>g</sup>, Tae Hyun Kim<sup>a,c</sup>, Soo-Jung Kim<sup>g,h</sup>, Kwangjin An<sup>d</sup>, Young-Soo Hong<sup>f,j</sup>, Seung-Goo Lee<sup>c,k,l,\*</sup> and Dae-Hee Lee<sup>a,c,k,l,m\*</sup>

<sup>a</sup>Synthetic Biology Research Center, Korea Research Institute of Bioscience and Biotechnology (KRIBB), Daejeon 34141, Republic of Korea

<sup>b</sup>Fermentation Convergence Research Group, Korea Food Research Institute, Wanju 55365, Republic of Korea

<sup>c</sup>Department of Biosystems and Bioengineering, KRIBB School of Biotechnology, University of Science and Technology (UST), Daejeon 34113, Republic of Korea

<sup>d</sup>School of Energy and Chemical Engineering, and Graduate School of Carbon Neutrality, Ulsan National Institute of Science and Technology (UNIST), Ulsan 44919, Republic of Korea

<sup>e</sup>Laboratory of Nuclear Magnetic Resonance, National Center for Inter-University Research Facilities (NCIRF), Seoul National University, Gwanak-gu, Seoul 08826, Republic of Korea

<sup>f</sup>Chemical Biology Research Center, Korea Research Institute of Bioscience and Biotechnology, Cheongju 28116, Republic of Korea

<sup>g</sup>Department of Biological Sciences and Biotechnology, Hannam University, Daejeon, 34054, Korea

<sup>h</sup>Research Center for Biological Cybernetics, Chonnam National University, Gwangju, 61186, Republic of Korea

<sup>i</sup> Department of Integrative Food, Bioscience and Biotechnology, Chonnam National University, Gwangju, 61186, Republic of Korea

<sup>j</sup> KRIBB School of Bioscience, University of Science and Technology, Daejeon 34141, Republic of Korea

<sup>k</sup> Graduate School of Engineering Biology, Korea Advanced Institute of Science and Technology (KAIST), Daejeon 34141, Republic of Korea

<sup>l</sup> Korea Biofoundry, Korea Research Institute of Bioscience and Biotechnology (KRIBB), Daejeon 34141, Republic of Korea

<sup>m</sup> Department of Integrative Biotechnology, College of Biotechnology and Bioengineering, Sungkyunkwan University, Suwon 16419, Republic of Korea

<sup>1</sup> Present address: Research Institute, Chong Kun Dang Bio Co. Ltd, Osong 28161, Republic of Korea

\* Correspondence:

Seung-Goo Lee, E-mail: sglee@kribb.re.kr, Tel: +82 42 860 4373;

Dae-Hee Lee, E-mail: dhlee@kribb.re.kr, Tel: +82 42 879 8225

<sup>†</sup> These authors contributed equally to this work.

**Table S1. Information of terpene synthases used in the phylogenetic tree**

| <b>Protein</b> | <b>GenBank accession number</b> | <b>Function</b>                   | <b>Species</b>                  | <b>Reference</b> |
|----------------|---------------------------------|-----------------------------------|---------------------------------|------------------|
| MrBOS          | KJ020282                        | (-)- $\alpha$ -Bisabolol synthase | <i>Matricaria recutita</i>      | 1                |
| EeBOS          | MH048990                        | (-)- $\alpha$ -Bisabolol synthase | <i>Eremanthus erythropappus</i> | 2                |
| CcBOS          | XP_024994640.1                  | (-)- $\alpha$ -Bisabolol synthase | <i>Cynara cardunculus</i>       | 3                |
| MrFS           | KJ020283                        | $\beta$ -Farnesene synthase       | <i>Matricaria recutita</i>      | 1                |
| AaFS           | AY835398                        | (E)- $\beta$ -Farnesene synthase  | <i>Artemisia annua</i>          | 4                |
| AmBOS          | LC106015                        | (+)- $\alpha$ -Bisabolol synthase | <i>Artemisia maritima</i>       | 5                |
| AkBOS          | LC106016                        | (+)- $\alpha$ -Bisabolol synthase | <i>Artemisia kurramensis</i>    | 5                |
| AaADS          | AJ251751                        | Amorpha-4,11-diene synthase       | <i>Artemisia annua</i>          | 6                |
| MrTPS4         | KJ020284                        | Bicyclogermacrene synthase        | <i>Matricaria recutita</i>      | 1                |
| AabrBOS1       | LC469617                        | (+)- $\alpha$ -Bisabolol synthase | <i>Artemisia abrotanum</i>      | 7                |
| AabrBOS2       | LC469618                        | (+)- $\alpha$ -Bisabolol synthase | <i>Artemisia abrotanum</i>      | 7                |
| PatTpsA        | AY508726                        | $\gamma$ -Curcumene synthase      | <i>Pogostemon cablin</i>        | 8                |
| LcCedS         | MK431785                        | Cedrol synthase                   | <i>Leucosceptrum canum</i>      | 9                |
| MpFS           | AF024615                        | (E)- $\beta$ -Farnesene synthase  | <i>Mentha x piperita</i>        | 10               |
| RelSpS         | MK775336                        | Isoprene synthase                 | <i>Ralstonia eutropha</i>       | 11               |

**Table S2. Primer sequences used in this study**

| Plasmid                            | DNA                                 | Name             | Sequence                              |
|------------------------------------|-------------------------------------|------------------|---------------------------------------|
| pET28-PaCS                         | pET28<br>(backbone)                 | V-pET28-PaCS-F   | ATCCGGCGGCAATCCTCGAGCACCACCACCACCA    |
|                                    |                                     | V-pET28-PaCS-R   | AGGAAGGTGCTCATGCTGCTGCCCATGGTATATC    |
|                                    | <i>PaCS</i>                         | I-pET28-PaCS-F   | CCATGGGCAGCAGCATGAGCACCTTCCTGGTTAG    |
|                                    |                                     | I-pET28-PaCS-R   | TGGTGGTGCTCGAGGATTGCCGCCGGATGAACCA    |
| pTSN-PaCS-Mm                       | pTSN-Bisa-Mm<br>(backbone)          | V-pTSN-PaCS-Mm-F | CGGCGGCAATCTAATATTCATTAAAGAGGAGAAA    |
|                                    |                                     | V-pTSN-PaCS-Mm-R | AGGAAGGTGCTCATGGTTAACCTCCTGTGTGAA     |
|                                    | <i>PaCS</i>                         | I-pTSN-PaCS-Mm-F | CAGGAGGTTAAACCATGAGCACCTTCCTGGTTAG    |
|                                    |                                     | I-pTSN-PaCS-Mm-R | CTCTTTAATGAATATTAGATTGCCGCCGGATGAA    |
| pSSN12Didi-MrBBS-IspA-PaCS-IspA-Mm | pSSN12Didi-MrBBS-IspA<br>(backbone) | V-pSSN-PaCS-Mm-F | GGCAATCTAATATTCATTAAAGAGGAGAAAGGTACCC |
|                                    |                                     | V-pSSN-PaCS-Mm-R | AGGTGCTCATGGTTAACCTCCTGTGTG           |
|                                    | <i>PaCS</i>                         | I-pSSN-PaCS-Mm-F | AGGTAAACCATGAGCACCTTCCTGGTTAG         |
|                                    |                                     | I-pSSN-PaCS-Mm-R | TTAATGAATATTAGATTGCCGCCGGATG          |

**Table S3. Nucleotide sequences of *PaCS* cDNA and *E. coli* codon-optimized *PaCS***

| Source                                                         | Nucleotide sequence                                                                                                                                                                                                                                                                                                                                                                                                                                                                                                                                                                                                                                                                                                                                                                                                                                                                                                                                                                                                                                                                                                                                                                                                                                                                                                                                                                                                                                                                                                                                                                                                                                                                                                                                                                                                                                                                                                                                                                                                                                                                                                                                                                                                                     | Reference         |
|----------------------------------------------------------------|-----------------------------------------------------------------------------------------------------------------------------------------------------------------------------------------------------------------------------------------------------------------------------------------------------------------------------------------------------------------------------------------------------------------------------------------------------------------------------------------------------------------------------------------------------------------------------------------------------------------------------------------------------------------------------------------------------------------------------------------------------------------------------------------------------------------------------------------------------------------------------------------------------------------------------------------------------------------------------------------------------------------------------------------------------------------------------------------------------------------------------------------------------------------------------------------------------------------------------------------------------------------------------------------------------------------------------------------------------------------------------------------------------------------------------------------------------------------------------------------------------------------------------------------------------------------------------------------------------------------------------------------------------------------------------------------------------------------------------------------------------------------------------------------------------------------------------------------------------------------------------------------------------------------------------------------------------------------------------------------------------------------------------------------------------------------------------------------------------------------------------------------------------------------------------------------------------------------------------------------|-------------------|
| <p><i>PaCS</i> cDNA<br/>(red letters:<br/><i>PaCS</i> ORF)</p> | <p>CCACCCTTAGAATATTTGAGATGTCAACCTTTTAGTTTCAAGTGCTTCC<br/>TTTTCTTCATCTATCTTACCATCGGCTGTTGATGACAATTGTGGCACGAAG<br/>CAGAATGTTATCCGCAACACTACGAATTTCAATGCTAGCATATGGGGAG<br/>ATCAATTTCTTACACCTGATGAGCCAGAAGATCTAGCGATGGAGAAACA<br/>AGCTGTTGAAGAGCTCAAAGAAGAAGTAAGAAAAGAGCTAATGATCAAA<br/>GCTTCCTCCAACGAACCACTGCAACATATGAAGATGATAGACCTTATTG<br/>ATGTAGTCCAACGCCTTGGAAATAGCCTATCATTGGAAGACGAGATCGA<br/>GGAAGCCTTGCAACATATCTATGTAACATATGGCGAAAAATGGATCGGT<br/>CATAACAACCTACAAAACATTGCTCTTTGGTCCGACTCCTTCGACAAC<br/>AAGGCTTCAACCTTTCATCAGAAATATTCAAAAACCATATGGACGAGGA<br/>GGGACGTTTTAAGGAATCCTTTGTGCTGATGCTCAAGGATTGCTTGCTT<br/>TGATGAAGCATCATATATGAAGGTGGAAGGAGAAAAAGTACTCGATGAT<br/>GCCCTCGAGTTCATAAACTCACCTTGTAAATCATAGCGAAGGATCCTT<br/>CTTGATTTCTTTATTAAGAACCCTAAATACAACAAGCACTAAAGCAGCCA<br/>CTCCGGAAAAGGTTGCCAAGGCTAGAGGCCGTGCGTTACATACCTATT<br/>TACCAACAAGAACCTTCCCACAATGAGGTCTTACTGAAGCTTGCAAAGT<br/>CTGATTTAATGTGCTACAATCAATGCACAAAAGGAGCTCAGCCAAATT<br/>TGCAAGTGGTGAAGGACTTGACATGCAAAAACAACTACCTTATGTTT<br/>GTGACAGATTGATAGAAGGCTATTTTGGATACTAGGAGTCTATTTGAGC<br/>CTCAACATTCTCGTACAAGAATGTTCTAATGAAAACATCCATGTGGTTG<br/>ATTGTTTTAGATGACACGTTTGATAACTATGGTACTTATGAAGAGCTCAAG<br/>ATCTTTACAGAAGCTGTTGAAAGATGGTCAATGAGTTGTTGGATACGCTT<br/>CCAGAATACATGAAACTAATATATCAAGAACCTTTGAATCATCACCAAGA<br/>AATGGAGGAACTAATTGAAAAGGAAGGAAAAGCATAACCAGATCCAATAT<br/>GTGAAAGAGATGGCAAAGAGGTTATTCGAAACAACCTAGTGAAGCTA<br/>GATGGTAAAAAGAGGGGTATATGCCAACTCTGGAAGAGTACATGTCTGTT<br/>TCAGTGAAGACTTGTACCTACGGCTTGTGATAGCGAGATCTTATGTTGG<br/>TAGAGCAGATCATATGGTCACTGAGGATACATTTAAATGGGTCACCACAT<br/>ACCCTCCTATTGTTAAAGCTGCATGTTTTATTTAAGACTTATGGATGATAT<br/>TACCACCCACAAGGAGGAACAAGAAAGAGGCCATGTTGCTTCAAGCA<br/>TCGAATGCTACCAAAATGAAACCGGAGCATCCGAGGAGGAAGCATGTA<br/>AATTCATCTTAAAAAATGAAAGATGCATGGAAAGTTATAAACAGAGACT<br/>CTCTCCGGCCAACAGAAATCCCATTTCTCTACTTATGTGACGATCAA<br/>CTTTCACGTCGCTGTGATGTCATTTATAAAGTTAACGATGGCTACACTC<br/>ATGCTGAGGAAGAAATGATAAGTCACATCAAATCGATCTTGGTTCATCCT<br/>GCAGCTATTTAAGATGTAAGATCGATTAATGCATGCGGTTTGTGTTGTT<br/>TACAAAATCGTATAGTTATAATTTATGTGCCATAAGCTTGTACGCATGTCA<br/>GCATGTGTGAAAAGAGTATATTAATCTGGCCATGCATGTACGTTGTTCA<br/>TGTGCATGCCATGTTGATCAGCAATAATCCATGTGATGTAAGAGTATGCTT<br/>CTTATTTGTATTCTATTGACTTGTGCATAGATCG</p> | <p>This study</p> |
| <p><i>E. coli</i> codon<br/>optimized<br/><i>PaCS</i></p>      | <p>ATGAGCACCTTCTGTTAGCAGCGCAAGCTTACGACGCTCGATTCTC<br/>CCGTCAGCAGTCGATGATAATTGTGGTACCAAACAGAATGTCATACGTA<br/>ACACAACCAATTTCAATGCAAGCATTGGGGCGACCAGTTTCTCACTC<br/>CCGATGAACCGGAAGATCTGGCTATGGAAAAACAAGCGGTTGAGGAG<br/>CTGAAAGAGGAAGTTCGTAAGGAACTGATGATTAAGCGAGCAGTAAC<br/>GAACCGCTGCAGCACATGAAAATGATTGACCTGATCGACGTTGTTCCAG<br/>CGTCTGGGCATCGCATATCATTTGGAAGACGAAATTGAGGAGGCCACTA<br/>CAGCACATTTACGTTACCTACGGTGAGAAGTGGATTGGTCATAACAATCT<br/>GCAGAACATTGCTCTGTGGTCCGACTGCTGCGTCAGCAGGGTTTCAA</p>                                                                                                                                                                                                                                                                                                                                                                                                                                                                                                                                                                                                                                                                                                                                                                                                                                                                                                                                                                                                                                                                                                                                                                                                                                                                                                                                                                                                                                                                                                                                                                                                                                                                                                                                          | <p>This study</p> |

CCTGAGCAGCGAAATTTTTAAAAACCACATGGATGAAGAAGGCCGTTTT  
AAAGAGAGCTTTTGCGCCGATGCACAGGGCCTGCTGGCCCTCTATGA  
AGCCAGCTACATGAAAGTTGAGGGCGAAAAAGTCCTGGATGACGCGC  
TGGAATTTACTAAAACCCATCTGGTTATAATAGCGAAGGATCCGAGCTGT  
GATAGCCTGCTGCGTACCCAGATACAGCAAGCGCTGAAACAGCCGCT  
GCGTAAGCGCCTGCCGCGTCTGGAAGCTGTTTCGTTACATTCCGATCTA  
TCAACAGGAACCCTCGCATAACGAAGTTCTGCTGAAACTGGCAAAGAG  
CGATTTAATGTGCTGCAGAGCATGCATAAAAAAGAACTGAGCCAAATTT  
GCAAATGGTGGAAAGATCTGGATATGCAAAATAAGCTGCCGTATGTTTCG  
CGATCGTCTGATCGAAGGGTACTTTTGGATTCTGGGAGTTATTTTGAAC  
CGCAGCACAGCCGCACCAGGATGTTCCCTGATGAAAAGTAGCATGTGG  
CTGATTGTTCTGGATGATACCTTTGACAACCTATGGTACCTATGAGGAACT  
GAAAATTTTTACCGAGGCGGTGGAACGCTGGAGCATGAGCTGCCTGG  
ATACACTGCCTGAATACATGAAACTGATTTATCAAGAGCTGCTGAATCAC  
CATCAAGAGATGGAGGAGCTGATTGAGAAGGAGGGTAAGGCATATCAA  
ATCCAGTATGAAAAGAAATGGCAAAGAAGTTATTCGTAACAATCTCGT  
CGAAGCCCCTTGGCTTAAGGAGGGTTACATGCCGACACTGGAGGAAT  
ACATGAGCGTTAGCGTTAAAACGTGTACCTATGGACTGATGATCGCCCC  
TAGCTATGTGGGGCGTGCCGATCACATGGTTACCGAAGACACCTTCAA  
ATGGGTTACCACCTATCCGCCATTGTGAAAGCCGCTTGTTTTATTCTG  
CGGCTGATGGACGATATTACCACCCATAAAGAGGAGCAAGAACGCGG  
ACATGTTGCCAGCAGCATTGAATGCTATCAGAACGAGACCGGGGCGA  
GCGAAGAAGAAGCTTGTAAGTTTATCCTGAAAAAGATTGAAGACGCGTG  
GAAAGTTATCAATCGTGACAGCTTGCGCCCGACCGAAATCCCCTTTCC  
GCTGCTGATGAGCACCATAAATTTTTCGAGGGCCTGCGACGTTATTTAT  
AAAGTGAATGATGGTTATACGCATGCTGAAGAAGAATGATTTCCCATAT  
CAAGAGCATCCTGGTTCATCCGGCGGCAATCTAA

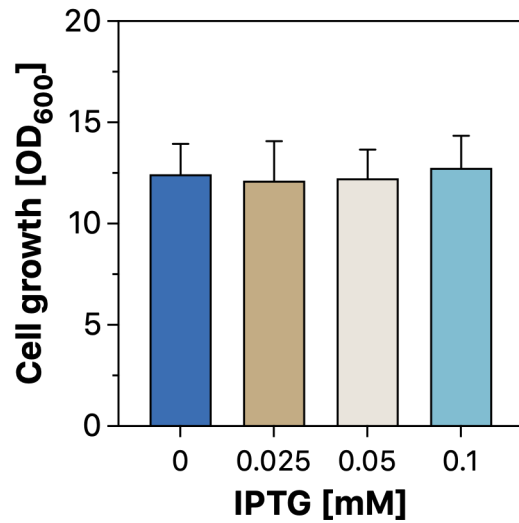

**Figure S1. Cell growth of *E. coli* SBA01 strain producing  $\gamma$ -curcumene in the presence of different concentrations of IPTG.** Different concentrations of IPTG (0–0.1 mM) were added to the *E. coli* SBA01 cells harboring pTSN-PaCS-Mm and pSSN12Didi-PaCS-IspA-Mm. The cells were grown on TB medium at 30°C with 10 g/L glycerol and 20% (v/v) *n*-dodecane. Data represent averages from three replicate cultures, and error bars indicate standard deviation.

## References

- (1) Son, Y. J.; Kwon, M.; Ro, D. K.; Kim, S. U. Enantioselective microbial synthesis of the indigenous natural product (–)- $\alpha$ -bisabolol by a sesquiterpene synthase from chamomile (*Matricaria recutita*). *Biochem J* **2014**, *463*, 239–248. DOI: 10.1042/Bj20140306.
- (2) Albertti, L. A. G.; Delatte, T. L.; de Farias, K. S.; Boaretto, A. G.; Verstappen, F.; van Houwelingen, A.; Cankar, K.; Carollo, C. A.; Bouwmeester, H. J.; Beekwilder, J. Identification of the Bisabolol Synthase in the Endangered Candeia Tree (*Eremanthus erythropappus* (DC) McLeisch). *Front Plant Sci* **2018**, *9*. DOI: 10.3389/fpls.2018.01340.
- (3) Lim, H. S.; Kim, S. K.; Woo, S. G.; Kim, T. H.; Yeom, S. J.; Yong, W. S.; Ko, Y. J.; Kim, S. J.; Lee, S. G.; Lee, D. H. (–)- $\alpha$ -Bisabolol Production in Engineered *Escherichia coli* Expressing a Novel (–)- $\alpha$ -Bisabolol Synthase from the Globe Artichoke *Cynara cardunculus* var. *Scolymus*. *J Agr Food Chem* **2021**, *69* (30), 8492–8503. DOI: 10.1021/acs.jafc.1c02759.
- (4) Picaud, S.; Brodelius, M.; Brodelius, P. E. Expression, purification and characterization of recombinant (E)- $\beta$ -farnesene synthase from *Artemisia annua*. *Phytochemistry* **2005**, *66* (9), 961–967. DOI: 10.1016/j.phytochem.2005.03.027.
- (5) Muangphrom, P.; Seki, H.; Suzuki, M.; Komori, A.; Nishiwaki, M.; Mikawa, R.; Fukushima, E. O.; Muranaka, T. Functional Analysis of Amorpha-4,11-Diene Synthase (ADS) Homologs from Non-Artemisinin-Producing *Artemisia* Species: The Discovery of Novel Koidzumiol and (+)- $\alpha$ -Bisabolol Synthases. *Plant Cell Physiol* **2016**, *57* (8), 1678–1688. DOI: 10.1093/pcp/pcw094.
- (6) Chang, Y. J.; Song, S. H.; Park, S. H.; Kim, S. U. Amorpha-4, 11-diene synthase of *Artemisia annua*: cDNA isolation and bacterial expression of a terpene synthase involved in artemisinin biosynthesis. *Arch Biochem Biophys* **2000**, *383* (2), 178–184. DOI: 10.1006/abbi.2000.2061.
- (7) Muangphrom, P.; Misaki, M.; Suzuki, M.; Shimomura, M.; Suzuki, H.; Seki, H.; Muranaka, T. Identification and characterization of (+)- $\alpha$ -bisabolol and 7-*epi*-silphiperfol-5-ene synthases from *Artemisia abrotanum*. *Phytochemistry* **2019**, *164*, 144–153. DOI: 10.1016/j.phytochem.2019.05.010.
- (8) Deguerry, F.; Pastore, L.; Wu, S. Q.; Clark, A.; Chappell, J.; Schalk, M. The diverse sesquiterpene profile of patchouli, *Pogostemon cablin*, is correlated with a limited number of sesquiterpene synthases. *Arch Biochem Biophys* **2006**, *454* (2), 123–136. DOI: 10.1016/j.abb.2006.08.006.
- (9) Luo, F.; Ling, Y.; Li, D. S.; Tang, T.; Liu, Y. C.; Liu, Y.; Li, S. H. Characterization of a sesquiterpene cyclase from the glandular trichomes of *Leucoscepttrum canum* for sole production of cedrol in *Escherichia coli* and *Nicotiana benthamiana*. *Phytochemistry* **2019**, *162*, 121–128. DOI: 10.1016/j.phytochem.2019.03.009.
- (10) Crock, J.; Wildung, M.; Croteau, R. Isolation and bacterial expression of a sesquiterpene synthase

cDNA clone from peppermint (*Mentha x piperita*, L.) that produces the aphid alarm pheromone (*E*)- $\beta$ -farnesene. *P Natl Acad Sci USA* **1997**, 94 (24), 12833–12838. DOI: 10.1073/pnas.94.24.12833.

(11) Lee, H. W.; Park, J. H.; Lee, H. S.; Choi, W.; Seo, S. H.; Anggraini, I. D.; Choi, E. S.; Lee, H. W. Production of bio-based isoprene by the mevalonate pathway cassette in *Ralstonia eutropha*. *J Microbiol Biotechn* **2019**, 29 (10), 1656–1664. DOI: 10.4014/jmb.1909.09002.
